# Supplementary material for: A Comparison of the Autistic Behavior Checklist and the Childhood Autism Rating Scale for Suspected Autism in a Large Chinese Sample
Source: Research Square preprint supplement (doi:10.21203/rs.3.rs-54129/v2), 2020-10-23
Supplement: Supplementary file 1 [file 3986c54102aa70208c1e9a2d.xlsx]

## Sheet: Sheet1
Name	Gender	Age	ABC	CARS	CABS
廉梓轩	1	3.1	79	36	20
姜沐妍	2	2.6	73	36	22
曾源正	1	3.8	69	34	18
王明轩	1	5.9	79	38	20
徐鼎问	1	3.2	77	36	18
魏逢君	1	6.4	74	35	16
郑允昊	1	5.3	67	33	18
尚懿廷	1	2	68	35	19
周影子	1	2.9	73	36	24
卓玮宸	1	5.2	79	42	21
庞霈泽	1	2.2	72	36	19
薛文哲	1	3.2	78	36	20
李恒毅	1	3.3	70	36	20
张琪	2	2.4	69	36	21
李佳城	1	2.4	67	36	21
张艺墨	1	2.7	73	36	22
王奕轩	1	2.11	71	43	22
刘洛含	2	2.3	72	36	21
耿天佑	1	3	80	36	22
杨孝国	1	3.7	75	36	20
程皓然	1	3.11	84	36	23
梁泰雨	1	4.7	75	36	19
陈泽航	1	3.1	76	36	21
张子谦	1	2.11	80	42	23
杨雨晨	1	2.6	80	36	22
赫海洋	1	7.2	81	49	20
尚皓轩	1	3.6	83	38	22
邢傲雪	2	4.1	86	37	24
黄佳玮	1	11.5	78	38	18
劳子怡	2	2.8	82	40	22
李洪宇	1	2.4	60	34	19
聂社金	2	3.9	79	36	21
席嘉曼	2	3.6	69	36	22
田涵樟	1	3.4	63	35	17
褚茗洋	1	8.1	72	36	19
王博文	1	2.2	73	39	19
李思宇	1	2.11	80	40	21
丁星博	1	2.5	68	36	19
张鑫宇	1	6.5	89	42	23
杨钦丞	1	3.2	58	36	19
史慧博	1	2.8	65	36	21
张晨希	2	3.11	76	36	18
吴梦桐	2	2.11	64	34	19
李煜	1	3.5	89	46	23
李思瑶	2	2.8	73	36	22
温子轩	1	2.3	60	36	19
张韩晟	1	4.9	75	36	19
武成恩	1	3.3	74	36	18
王宏硕	1	2.1	59	36	19
王翊涵	2	1.11	66	34	18
姜泽正	1	2.1	61	36	19
郝翊辰	2	3.7	72	35	17
张子峻	1	2.6	69	36	21
朱宇博	1	4.8	64	36	19
闫子诺	1	3.4	68	38	20
何语忱	2	5.8	67	36	19
王睿熙	1	2.9	64	35	19
王旷博	1	6.1	104	52	25
朱可清	1	3.4	85	37	20
刘轩	1	2.1	70	36	19
任天宇	1	5.1	87	41	23
李宣毅	1	4.8	54	35	18
刘彦丞	1	1.8	58	34	18
张恒博	1	2.1	71	36	20
石沛霖	1	7.4	78	42	20
王梓涵	1	3.1	76	46	22
赖景鑫	1	3.3	74	36	22
吕书满	1	5.6	83	41	22
吴佳骏	1	5.5	85	41	22
王嘉豪	1	3.11	72	39	22
王云凯	1	5.6	75	42	20
罗浩轩	1	4.1	74	37	20
李明哲	1	3.1	75	37	22
余淑珍	2	8.7	85	41	21
赵晙博	1	5	80	46	21
闫书恺	1	7.4	78	36	19
温家硕	1	2.1	71	36	19
杨圣泽	1	2	58	36	19
李广栋	1	3	84	45	25
靳祎凡	1	4.8	80	45	24
乔伟琛	1	2.8	72	35	19
崔昕晨	1	6.8	74	46	20
李韵涵	1	2.3	67	36	20
赵宸浩	1	2.1	70	46	22
郭孝旸	1	2.11	55	34	17
闫秋泽	1	4.11	79	41	20
马赫	1	5.1	81	44	24
程裕皓	1	2.1	69	36	19
乔艺婷	2	4.6	74	42	21
乔艺馨	2	4.6	70	43	23
张瀚锦	1	1.3	54	35	17
王昱哲	1	3	63	34	19
康熙博	1	3	77	36	22
胡诗诺	2	4.7	78	39	20
杨梓涵	1	5.1	80	36	21
胡哲睿	1	4.7	68	36	21
付宸硕	1	2.6	61	34	17
张钰昊	1	2	59	35	16
张培栋	1	3.4	80	42	22
陈冠泽	1	3.5	63	36	19
张文栋	1	4.7	52	26	13
朱彤远	2	5.11	45	26	8
王德宇	1	2.5	64	34	19
谢雨森	1	3.5	69	30	15
郭子鸣	1	2.9	49	32	15
刘华贵	1	8.3	64	33	17
孙泓杰	1	3.2	55	31	13
邹贞璞	1	3.4	46	31	13
李东洲	1	6.11	77	35	19
谭辰新	1	2.5	58	36	21
张静得	1	2.8	76	34	16
汪建勋	1	5.11	25	21	8
卡朱然	1	12.1	25	26	14
杨欣默	1	2.5	63	38	21
薛金艺	1	5.4	82	42	22
曹博尊	1	2.9	49	32	19
鲁晨硕	1	2.9	63	26	13
郭宇辰	1	2.11	58	34	18
梁越麟	1	3.1	45	31	13
张珈胤	1	7.9	57	31	15
刘力申	1	2.11	32	25	10
陈思瑗	2	3.7	57	31	16
赵兴安	1	2.1	53	37	20
张景皓	1	6.11	75	34	20
李子妍	2	2.1	51	30	15
赵禹森	1	1.1	63	36	20
孙浩龙	1	3.5	52	30	14
高萧迪	1	4.6	46	30	11
李睿思	2	3.1	60	32	13
苏莉萍	2	1.6	8	17	12
彭五续	1	3.8	61	35	16
范子柠	1	3.4	42	26	12
陈家辉	1	5.2	57	32	16
杜睿哲	1	2.5	54	35	20
魏翎轩	1	2.3	71	33	18
冯源野	1	4.1	68	35	16
刘雨森	1	6.11	80	38	23
王梓睿	1	2.9	77	40	22
冀英博	1	4.7	73	37	19
贺雨泽	1	0.3	92	41	25
杨雨翰	1	4.4	83	36	18
孙梁植	1	2.9	55	32	14
孙元彬	1	6.3	49	32	16
方子元	1	2.1	64	37	18
张珉赫	1	3.7	75	31	16
崔哲康	1	2.11	41	29	13
王西童	1	14	78	34	21
尹博元	1	3.4	60	33	21
王墨然	1	4.6	65	31	15
张睦晴	2	14	35	29	12
谭靖杨	1	2.1	48	31	16
王浚羽中	1	3.11	51	30	15
贺懿轩	1	3.11	65	30	14
杨怡航	1	7.3	52	33	18
赵一霖	2	1.11	55	31	16
俞钧瑞	1	4.11	59	34	17
刘耀东	1	2	68	35	19
刘超睿	2	5.1	36	28	13
庄新晨	1	1.8	41	29	13
龚凯威	1	8.9	95	38	18
王成帅	1	6.8	74	32	23
王子来	1	2.9	56	32	15
党宇豪	1	5.2	53	31	16
隋易航	1	8.1	43	33	15
罗启晟	1	6.1	57	30	12
罗予宸	1	4	54	30	18
柴新扬	2	13.9	35	27	10
张轩豪	1	8	32	27	8
梁恺奇	1	1.11	62	33	15
王艺澎	1	3.3	44	29	13
周栩琪	2	3.1	77	40	18
仇子豪	1	2.3	69	43	20
元子骏	1	5.2	84	37	20
从严	1	4	86	37	21
刘乙泽	1	5.8	83	31	16
王硕	1	7.1	33	26	13
杨浩冉	1	2.11	65	33	17
何欣晨	1	3.2	45	30	14
王铎然	1	5	24	24	11
刘思哲	1	6.4	59	30	15
庞韶轩	2	2.6	55	33	15
邵涵辰	1	3.1	67	33	15
王淑宸	1	3.6	46	31	13
董恩硕	1	6	67	35	16
赵言溪	1	1.7	49	34	36
焦志鹏	1	5.2	44	24	14
白淳风	1	5.4	68	32	13
王玉涛	1	4.3	42	29	13
刘骁	1	2	58	29	14
刘皓博	1	1.1	56	37	19
马奕骁	1	3.4	70	33	17
张颖智	1	2.5	65	36	15
彭湘媛	2	6.9	49	35	13
张子涵	1	4.11	54	36	17
王唐旭	1	2.2	36	30	10
尹梓汌	1	3.6	78	36	20
焦贺轩	1	6.3	73	41	20
李梓鸣	1	5.9	78	38	21
王峻涵	1	3.5	80	46	24
武雨乐	1	3.9	78	45	22
郝亦航	1	4.8	78	38	20
钱梓琪	2	2.6	72	43	19
蒋博轩	1	4.7	60	35	18
宋婉茹	2	1.9	57	33	17
杨国帅	1	7.4	48	31	14
崔凯宇	1	7.2	77	36	18
李思拓	1	2.8	58	36	20
张辛泽	1	3	74	39	23
申梦飞	1	3.2	68	38	20
刘梓羡	1	3.4	78	37	23
六安心	1	2.9	71	36	21
阿迪潝	1	5.3	38	24	10
田艺航	1	2.1	72	36	18
朱奕泊	1	2.5	73	38	21
许家跃	1	3.1	69	36	17
温欣泽	1	6.1	89	44	23
王楚	1	4.11	95	41	24
苏宸	1	4.7	87	38	22
李昊博	1	3	76	38	20
刘一凡	1	3.3	84	40	23
修贤浩	1	4.2	93	41	24
胡家豪	1	5.9	83	38	22
高振东	1	3.4	52	35	17
孙艺晨	1	3.1	39	19	8
付保金	1	13	66	36	17
王睿哲	1	4.7	68	35	19
袁晟睿	1	3.1	84	47	22
冯昌晗	1	4.7	65	37	21
樊铎宇	1	5	55	32	17
李雨宸	1	2.9	60	34	16
纪亿轩	2	2.2	77	42	22
雷越	2	4.6	79	39	19
王俊豪	1	3.9	80	43	20
庞羿麟	1	3.3	73	38	20
张芯宁	1	6.6	86	40	24
王世珩	1	13	81	44	20
廖俊鹏	1	3	78	36	22
郎熙宁	1	5.3	69	33	18
王子弋	1	8	75	36	22
赵沐辰	1	2	67	35	19
范浩洋	1	2.8	74	36	19
张奥祥	1	1.1	89	45	23
尹晨璎	2	2.8	69	35	19
赵墨	1	1.1	61	36	18
张一帆	1	3.7	73	36	21
高慕涵	1	3.1	75	34	19
张明哲	1	3.6	42	21	10
陈栗峰	1	2.4	76	34	17
李浚铭	1	5	82	39	22
范佳凯	1	7.8	69	35	17
李景雯	2	2.9	70	36	22
韩璐璐	2	3.7	77	36	20
翁悦洋	2	2.1	72	36	21
骆东升	1	2.6	60	32	16
刘润霖	1	1.11	66	46	19
郭建勋	1	5.8	80	36	21
唐艺菲	2	3	67	36	18
李伟宸	1	2.2	69	36	20
张轩宇	1	3.1	79	36	22
李沐宸	1	2.4	69	36	19
杨晔奇	1	6.11	57	34	17
杨千慧	2	4	97	47	23
陈皓燃	1	2.1	74	38	19
伊兰昊天	1	7.1	46	25	14
黎明浩	1	2.1	55	31	15
赵文楷	1	3.3	69	36	22
吴彦博	1	3	75	36	22
解知临	2	2.1	47	26	13
李梓帆	1	5.6	82	39	23
薛思涵	1	4.4	72	36	22
宋艾轩	1	4.9	59	32	16
李逍遥	1	4.7	77	35	19
杨佳林	1	4.6	88	43	23
商启航	1	2.8	64	36	18
侯宇轩	1	6.2	67	36	17
任星宇	1	2.1	42	29	15
钱莀熙	2	3.8	70	35	19
李恩泽	1	5.11	84	44	22
王怡涵	2	2.3	72	36	21
徐刘文一	1	4.6	55	32	17
何子瑶	2	2.9	68	36	22
孔梓馨	2	3.2	85	45	23
刘宇航	1	3	79	36	22
姚浩轩	1	4	75	37	21
王恒博	1	3.1	80	40	21
邵钰翔	1	2.8	63	36	18
董腾岳	1	4.6	77	39	23
张嘉材	1	3.1	63	36	17
王景尧	1	3.9	67	36	20
宋子涵	2	6.1	61	30	17
商籽萱	1	2	70	36	19
闫效瑜	1	1.5	66	34	18
刘雨泽	1	3.1	86	39	22
田家瑞	1	3.8	70	38	20
王源浩	1	7.9	69	32	19
李硕	1	4.9	52	29	17
张彬琦	1	9	58	32	14
冯俊宇	1	2.1	59	35	18
林书成	1	5.6	67	35	17
穆家隽	1	5.5	71	35	17
葛庆轩	1	2.11	67	36	20
李宗翰	1	5.1	75	36	18
刘旭	1	5.7	68	41	22
刘浩扬	1	3	69	36	20
刘若寒	1	3.1	57	35	18
孙嘉程	1	4.11	82	36	20
张锦航	1	3.1	78	46	25
苗锦轩	1	3.4	71	35	19
张云汐	1	5.11	53	34	16
张文宇	1	3.2	70	41	22
刘辰赞	1	4.1	83	40	22
刘冠江	1	2.8	50	31	14
董靖翊	1	6.2	73	36	20
闵心岚	2	2.9	70	36	20
周易轩	1	2.7	66	34	18
王棋	2	4	79	36	19
赵兆辰	1	8.11	62	34	16
郭禹琛	1	2.1	70	45	23
董牧歌	1	2.1	65	36	21
陈玉峰	1	2.5	74	36	18
张子煦	1	2.7	65	40	20
冯艺馨	2	4.2	83	43	23
丁梦垚	2	2.1	63	35	16
张子彧	1	5.11	70	34	17
李源铄	1	3.5	57	32	15
李梓彤	2	2.4	57	34	17
陈思雨	2	4.1	81	52	23
赵若帆	2	3	68	36	19
孙睿杰	1	2.9	86	43	21
陈晋宇	1	4.8	70	35	19
李奕彤	2	2.11	64	39	14
李均锴	1	3	62	29	13
郑世禹	1	5.6	62	32	20
徐行	1	6	30	23	9
王思宇	1	2.8	85	35	20
赵子靖	1	2.7	54	32	16
杨昊晔	1	8	52	34	18
曹书阁	1	3.7	59	31	16
韩沛昊	1	2.1	59	30	13
张博然	1	2.9	82	42	19
秦浩宸	1	2.1	58	34	17
王治延	1	6	58	34	18
宋恩朗	1	5.2	61	31	18
刘子赫	1	3	70	38	22
于晨翊	1	3.3	67	33	21
张瑞旭	1	3.7	59	31	16
孙搏	1	3.2	74	32	16
张晟旭	1	3	54	31	17
沈宜淳	1	3.5	93	34	20
王天睿	1	1.6	65	41	17
陈悦阳	1	2.4	68	40	17
刘涵予	1	2.1	59	40	22
杨梓妍	2	2.8	96	34	21
徐储	1	3.4	84	35	19
林润祺	1	3	86	40	21
刘星宇	1	2	50	30	17
谢嘉玺	1	1.9	21	25	11
陈俞江	1	11.2	37	30	14
胡博雅	2	6	79	30	14
余昊泽	1	3.4	75	37	18
肖世鑫	1	4.7	76	29	15
靳诺	2	4.2	57	30	15
王乔	2	2.7	76	34	18
郝一凡	1	2.6	70	38	22
张展翊	1	3.9	73	33	19
马云腾	1	4.11	59	33	15
贾紫航	1	3.2	67	34	18
张耀天	1	5	63	33	15
池俊希	1	2.9	80	35	20
周唏霖	1	6.7	86	47	24
王博然	1	3.2	68	29	15
耿钰程	1	13.1	33	29	13
张鸩馨	2	4.9	68	33	19
刘珂源	1	3.4	53	30	16
杨钰涵	2	3.1	81	34	19
李昱泽	1	3.2	82	39	19
刘子辰	1	7.7	68	33	17
高诺	2	3.6	82	40	20
李馨怡	2	2.7	76	48	17
朱麟淇	1	2	54	34	16
乔昊睿	1	5.8	76	34	22
窦文贺	2	6	60	35	15
肖边乘	1	7.4	55	29	14
李丰硕	1	2.8	58	33	16
宋子帅	1	8	79	34	19
张泰	1	3.1	53	31	17
于梦晨	2	2.5	56	31	18
徐子睿	1	3.4	39	24	11
刘培乐	1	2.2	68	35	23
张涵喆	2	10.7	20	22	9
太梓乔	1	5.9	47	30	16
李俊潇	1	5	58	32	17
傅鹏诚	1	2	55	32	17
胡铭洋	1	3.1	75	32	15
周明浩	1	5.2	29	26	13
秦贤政	1	1.9	56	32	15
周生崴	1	9	45	30	19
谢铭轩	1	4.8	70	36	20
宋文栋	1	2.9	52	29	13
朱益辰	1	2.8	52	34	15
臧李潼	1	2	60	38	19
董午原	1	5.3	76	33	18
王皓谦	1	2.9	67	35	19
钱恺文	1	5.11	26	23	10
张梓涵	2	3.8	81	36	17
郭梓淳	1	2.9	50	30	15
田子墨	1	5.6	74	33	17
齐浦一	1	7	23	24	9
李明朗	1	4.1	91	51	25
张宸羽	2	5.5	50	30	15
王天瑞	1	3.6	61	32	16
刘思睿	1	9.2	69	33	16
高辰浩	1	6.8	68	32	15
王泓圣	1	6.6	73	38	17
于岷昇	1	6.1	17	19	8
祁桢宜	2	1.8	38	22	9
袁润	1	3.7	57	33	17
郑心睿	2	4.8	37	24	11
郭鑫晨	1	2.11	96	41	22
蔡雨琦	2	5	63	31	18
霍禹淇	1	2.4	50	35	17
冯鑫炎	1	2	83	37	17
高士哲	1	6.4	45	32	18
李悟	1	3	76	38	20
郑皓予	1	3.2	100	40	21
徐子钦	1	3.4	56	32	15
刘瑞垚	1	3.2	47	32	14
徐子谦	1	6.3	30	26	11
邓沐森	1	2.8	75	35	20
于浩雨	1	6.2	68	32	19
李俊驰	1	6	43	31	14
周禹泽	1	9.2	56	27	15
张祎然	1	2.8	75	33	18
张冠鹏	1	1.9	58	32	15
王鹏旭	1	8.1	81	33	22
刘怡若姗	2	2.5	67	33	15
王卓飞	1	4.4	77	37	17
张博源	1	2.3	42	26	14
孙硕泽	1	6	77	35	18
贾炳睿	1	2	92	35	22
周俊熙	1	1.11	73	36	21
张国骏	1	6.9	47	32	14
胡孝严	1	7.6	55	27	13
金泽希	1	2	31	29	9
刘致远	1	4	61	32	16
高晨茹	2	3.6	58	30	10
孟一诺	1	2.2	60	32	16
徐浩轩	1	6.1	67	34	18
刘明轩	1	6	75	35	16
郑羽涵	1	5	45	22	10
刘牧	1	2.2	73	33	17
张涵	1	3	63	32	15
何亦辰	1	2.1	67	34	18
陈建平	1	4	72	42	20
高川	1	3.6	81	41	24
及龙啸	1	6.11	65	30	13
石修竹	1	5.11	21	22	8
崔晋堂	1	3.5	55	32	17
倪宸	1	5.5	23	26	9
陈科儒	1	7	29	29	15
姚博文	1	2.3	66	34	20
曹张悦	2	9.2	82	41	20
李木辰	2	8	44	33	13
王婷婷	2	6	80	35	22
杜少轩	1	4	30	27	12
于翰博	1	8	51	31	16
张子墨	1	2.4	82	29	18
柳梓航	1	2.1	100	40	21
周世康	1	2.2	46	30	15
陈雨桐	1	3.1	62	35	19
高辉文	1	2	82	37	20
王俊策	1	2	75	36	20
李奕墨	1	4.1	66	31	15
李道郡	1	2.7	71	36	22
王浩宇	1	6.11	41	27	11
张介俊	1	3.9	59	36	19
戈禹荀	1	4	40	28	14
马玉鑫	1	4.7	60	34	19
翟若言	2	9.7	21	25	6
王宗皓	1	2	51	28	12
牛念瑞	1	3.3	79	34	21
刘行	1	9.7	58	32	19
薛天佑	1	1.7	75	33	18
焦锦柯	1	3.7	69	35	19
范奕卓	1	2	42	30	14
涂桦	1	3.4	57	30	14
许腾跃	1	2.9	87	33	21
陈君浩	1	5	78	37	21
张晟铭	1	5	73	33	18
赵家企	1	2.7	60	32	18
李岱轩	1	9.2	65	31	18
刘懋源	1	2.11	56	31	17
艾计阳	1	4.9	57	33	16
赵一伟	1	9.2	69	33	15
高雨轩	1	6.11	79	33	17
郭笋菡	1	3.9	102	39	20
王予骐	1	4.11	47	30	15
董志强	1	4	67	36	18
温天皓	1	6.9	62	31	17
张志艺	1	1.11	93	37	24
王铂冲	1	7.9	76	34	16
马晨旭	1	3.8	97	41	24
倪浩宇	1	3.6	65	34	17
李佳乐	1	2.7	70	40	19
于世祥	1	2.9	67	33	18
程帅	1	1.11	73	40	19
刘佳委	1	5.2	44	30	12
刘景川	1	2.8	64	36	19
胡卓杨	2	6	71	34	18
刘恒东	1	3	32	25	13
杨浩铭	1	4.8	79	32	20
赵志瑞	1	10	37	28	15
王诗远	1	4	39	30	13
姚奕兴	1	3.3	64	34	17
黄梓轩	1	3.8	62	32	18
杨盛捷	1	4	56	32	16
何易鑫	2	4	76	34	20
李钊远	1	4	66	31	16
高梓鑫	1	3.4	68	34	18
程傲渲	1	1.6	55	33	12
苏小镔	1	10	67	31	15
李承泽	1	4	84	33	20
张博涵	1	4.5	74	30	16
肖君晟	1	4	88	38	22
李念宸	1	3.5	72	34	19
张原浩	1	3	80	32	17
王俞博	1	4	59	30	11
高梓宸	1	5.9	68	36	17
史一鸣	1	5.11	33	26	10
金鸿森	1	2.9	73	34	17
罗程钶	1	3.9	59	31	13
杨宜霖	1	4.5	54	30	12
胡晓航	2	7	79	38	20
陆心杨	2	5.6	92	38	25
张朝博	1	3.11	57	30	15
张朝渊	1	3.11	99	43	24
陈俊旭	1	5	58	28	13
马泽凯	1	4	60	32	15
陈麒羽	1	5.8	100	44	23
李钰浩	1	2	83	33	19
王沁卓	1	5	20	23	12
殷晨希	2	8	70	32	20
郭郝阳	1	6	76	32	20
蔡先皓	1	2.7	65	32	15
杨茗予	1	4	39	31	13
刘译文	1	2.9	48	33	17
孙显植	1	5	30	30	14
徐博远	1	6	64	30	18
王俊熙	1	4.7	37	24	13
高国博	1	6.8	70	38	21
葛思恬	2	2.11	60	29	12
匡宏勋	1	8.8	43	25	11
王彩伊	2	2.3	91	35	21
刘骏熙	1	5.5	72	32	18
铁翔	1	4.5	60	34	19
卢嘉傲	1	5.11	48	32	18
武鑫博	1	4.9	82	40	21
马晓震	1	3	61	32	16
刘俊良	1	7	47	31	17
黄浩厚	1	3	47	29	14
贾云天	1	6.5	60	34	20
王翰霄	1	2.11	63	32	18
侯子豪	1	3	76	33	18
王翰铭	1	4	65	35	19
杨若伊	2	4	58	30	11
许逸晨	1	2.2	42	30	17
杨晨乐	1	1.11	97	31	17
朱煜霖	1	2.2	61	30	19
曹焯凯	1	2	81	36	23
刘文杰	1	4	32	30	16
高语桐	2	3.4	107	42	25
刘睿泽	1	2.1	43	28	12
马羽笙	1	2.4	86	31	18
王禹桐	1	8	88	37	22
邹泓恺	1	6.8	54	33	14
詹俊益	1	3.7	81	33	20
刘云珑	1	5	69	30	15
吴允诺	2	2.7	68	32	18
王映然	2	6	76	32	20
李致远	1	4.11	66	34	17
特伦	1	5.11	77	40	23
李冠银	1	2.7	68	31	18
高家杭	1	3.7	101	44	20
秦绍淳	1	5	45	23	12
邱子峻	1	6	58	31	19
王子涵	2	11.8	40	28	12
宫散洋	1	5.5	75	35	19
刘晨曦	2	4.9	41	26	15
丁润泽	1	4	45	30	13
刘诚毅	1	4.5	63	30	17
崔皓宸	1	4.7	27	26	14
